# Supplementary material
Source: publisher site journal article supplement (https://www.dovepress.com/get_supplementary_file.php?f=270830.docx)
Supplement: Supplementary file 1 [file get_supplementary_file.php]

**Supplemental Table 1 Demographic characteristics of CRC patients with PM in SEER database**

| **Characteristics** | **Variables** | **Value, N (%)** |
| --- | --- | --- |
| Age (year) | ≥70  <70 | 1264(40.1%)  1891(59.9%) |
| Sex | Male  Female | 1542(48.9%)  1613(51.1%) |
| Primary cancer | Left Colon cancer  Right colon cancer  Rectal cancer  Unknown | 1099(34.8%)  1557(49.4%)  215(6.8%)  284(9.0%) |
| Pathological type | Adenocarcinoma  Mucinous cancer  Signet-ring cell cancer  others | 1974(62.6%)  630(20.0%)  325(10.3%)  226(7.2%) |
| Grade | Grade I  Grade II  Grade III  Grade IV  Unknown | 98(3.1%)  1187(37.6)  942(29.9)  228(7.2%)  700(2.2%) |
| T stage | T0  T1  T2  T3  T4a  T4b  T4NOS  Tx | 33(1.0%)  135(4.3%)  22(0.7%)  687(21.8%)  779(24.7%)  898(28.5%)  13(0.4%)  588(18.6%) |
| N stage | N0  N1  N2  Nx | 945(30.0%)  813(25.7%)  1073(34%)  324(10.3%) |
| Primary cancer Surgery | None  Performed  Unknown | 1070(33.9%)  2080(65.9%)  5(0.2%) |
| Metastasis cancer Surgery | None  Performed  Unknown | 2305(73.1%)  848(26.9%)  2(0.1%) |
| Tumor Deposits | None  Present  Unknown  No-Surgery | 861(27.29%)  1123(35.59%)  308(9.76%)  863(27.35%) |
| CEA | Negative  Positive  Unknown | 670(21.2%)  1389(44.0%)  1096(34.7%) |
| Tumor Size | <5cm  ≥5cm  Unknown | 942(29.8%)  1305(41.4%)  907(28.7%) |
| Perineural invasion | None  Present  Unknown | 1381(43.8%)  662(21.0%)  1112(35.2) |
| Scope Reg LN Sur | None  Present  Unknown | 1174(37.2%)  1940(61.5%)  41(1.3%) |
| Scope Reg LN Sur (Number) | <4  ≥4  Unknown | 1238(39.2%)  1876(59.5%)  41(1.3%) |
| Marital status at diagnosis | Married  Single  Divorced  Widowed  Separated  Unknown |  |

**Note:**

**Abbreviations:** N: number; CEA: carcinoembryonic antigen; Scope Reg LN Sur: Regional Lymph Node Surgery in surgery.
